# Supplementary material for: Analysis of Molecular Pretreated Tumor Profiles as Predictive Biomarkers of Therapeutic Response and Survival Outcomes after Neoadjuvant Therapy for Rectal Cancer in Moroccan Population
Source: Hindawi journal article supplement (doi:10.1155/2020/8459303), 2020-01-11
Supplement: f1 [file 8459303.f1.pdf]

Supplementary Materials for:

Analysis of Molecular Pretreated Tumor Profiles as Predictive Factors of Therapeutic Response and Survival Outcomes After Neoadjuvant Therapy For Rectal Cancer in Moroccan Population

Ihsane El Otmani<sup>1,2,3\*</sup>, Fatima El Agy<sup>1,2</sup>, Sanae El Baradai<sup>2</sup>, Laila Bouguenouch<sup>3</sup>, Nada Lahmidani<sup>4</sup>, Mohammed El Abkari<sup>4</sup>, Dafr Allah Benajah<sup>4</sup>, Imane Toughrai<sup>5</sup>, Hicham El Bouhaddouti<sup>5</sup>, Ouadii Mouaqit<sup>5</sup>, Ibn Majdoub Hassani Karim<sup>5</sup>, Khalid Mazaz<sup>5</sup>, El Bachir Benjelloun<sup>5</sup>, Abdelmalek Ousadden<sup>5</sup>, Karima El Rhazi<sup>6</sup>, Touria Bouhafa<sup>7</sup>, Zineb Benbrahim<sup>8</sup>, Karim Ouldin<sup>3</sup>, SidiAdil Ibrahimi<sup>5</sup>, Khalid Ait Taleb<sup>5</sup>, Laila Chbani<sup>1,2</sup>

**Table S1:** The sequence of primers used in PCR

| Sequence of primers F/R :<br>(5'>3')                                                      |
|-------------------------------------------------------------------------------------------|
| <b>KRAS gene</b>                                                                          |
| <b>Exon 2</b><br><i>F : GGTGGAGTATTTGATAGTGTA</i><br><i>R : GTCCTGCACCAGTAATATGCA</i>     |
| <b>Exon 3</b><br><i>F : AGTAAAAGGTGCACTGTAATA</i><br><i>R : CTCCTTAATGTCAGCTTATTAT</i>    |
| <b>Exon 4</b><br><i>F : CTCTGAAGATGTACCTATGGTC</i><br><i>R : CAGTGTTACTTACCTGTCTTGT</i>   |
| <b>NRAS gene</b>                                                                          |
| <b>Exon 2</b><br><i>F : ATTTGCCATAAATAAAGGC</i><br><i>R : TAAATAAATTTGCCATA</i>           |
| <b>Exon 3</b><br><i>F : ACCCTCCACACCCCCAGGATT</i><br><i>R : CTGTAGAGGTTAATATCCGCA</i>     |
| <b>Exon 4</b><br><i>F : CCCGTTTTAGGGAGCAGATTA</i><br><i>R : CCAGAGTTAATCAACTGATGC</i>     |
| <b>BRAF gene</b>                                                                          |
| <b>Exon 15</b><br><i>F : TGCTTGCTCTGATAGGAAAATG</i><br><i>R : GTAACCTCAGCAGCATCTCAGGG</i> |

**F**, Forward. **R**, Reverse. **PCR**, Polymerase chain reaction

**Table S2:** Association between TRG Dvorak regression and biomarkers

|               | Dvorak  |          |          |         | p value |
|---------------|---------|----------|----------|---------|---------|
|               | 1       | 2        | 3        | 4       |         |
| Ki 67         |         |          |          |         |         |
| <50           | 1(5.6)  | 9(50)    | 6(33.3)  | 2(11.1) | 0.357   |
| ≥50           | 7(17.9) | 11(28.2) | 16(41.1) | 5(12.8) |         |
| MSI           |         |          |          |         |         |
| Stable        | 7(15.2) | 14(30.4) | 20(43.5) | 5(18.2) | 0.312   |
| unstable      | 1(9.1)  | 6(54.5)  | 2(18.2)  | 2(10.9) |         |
| KRAS exon 2   |         |          |          |         |         |
| Wild type     | 6(14.6) | 15(36.6) | 14(34.1) | 6(14.6) | 0.673   |
| Mutated       | 2(12.5) | 5(31.3)  | 8(50)    | 1(6.3)  |         |
| HER 2 scoring |         |          |          |         |         |
| 0             | 7(16.3) | 13(30.2) | 17(39.5) | 6(14)   | 0.703   |
| 1             | 0(0)    | 5(62.5)  | 2(25)    | 1(12.5) |         |
| 2             | 1(33.3) | 1(33.3)  | 1(33.3)  | 0(0)    |         |
| 3             | 0(0)    | 1(33.3)  | 2(66.7)  | 0(0)    |         |
| P53           |         |          |          |         |         |
| <20           | 0(0)    | 3(50)    | 3(50)    | 0(0)    | 0.026   |
| 20-50         | 1(12.5) | 2(25)    | 1(12.5)  | 4(50)   |         |
| ≥50           | 7(16.3) | 15(34.9) | 18(41.9) | 3(7)    |         |

**Table S3:** Association between the percentage of therapeutic response and biomarkers

|             | Therapeutic response<br>N=57 |                              | P value |
|-------------|------------------------------|------------------------------|---------|
|             | Non responder group          | Responder group              |         |
|             | <50% of therapeutic response | ≥50% of therapeutic response |         |
| Ki 67       |                              |                              |         |
| <50         | 7(39.9)                      | 11(61.1)                     | 0.527   |
| ≥50         | 14(35.9)                     | 25(64.1)                     |         |
| MSI         |                              |                              |         |
| Stable      | 16(34.8)                     | 30(65.2)                     | 0.372   |
| instable    | 5(45.5)                      | 6(54.5)                      |         |
| KRAS exon 2 |                              |                              |         |
| Wild type   | 16(39)                       | 25(61)                       | 0.410   |
| Mutated     | 5(31.3)                      | 11(68.8)                     |         |

|                      |               |          |          |       |
|----------------------|---------------|----------|----------|-------|
| <b>HER 2 scoring</b> |               |          |          |       |
|                      | <b>0</b>      | 16(37.2) | 27(62.8) | 0.998 |
|                      | <b>1</b>      | 3(37.5)  | 5(62.5)  |       |
|                      | <b>2</b>      | 1(33.3)  | 2(66.7)  |       |
|                      | <b>3</b>      | 1(33.3)  | 2(66.7)  |       |
| <b>P53</b>           |               |          |          |       |
|                      | <b>&lt;20</b> | 3(50)    | 3(50)    | 0.628 |
|                      | <b>20-50</b>  | 2(25)    | 6(75)    |       |
|                      | <b>≥50</b>    | 16(37.2) | 27(62.8) |       |

**TableS4:** Association between clinicopathological characteristics and Immunohistochemical biomarkers

|                                          | MSI      |          | p     | Ki-67    |          | p     | HER-2    |         |         |         | p     | P-53    |          |          | p     |
|------------------------------------------|----------|----------|-------|----------|----------|-------|----------|---------|---------|---------|-------|---------|----------|----------|-------|
|                                          | stable   | unstable |       | Low      | high     |       | Score 0  | Score 1 | Score 2 | Score 3 |       | low     | moderate | high     |       |
| Gender                                   |          |          |       |          |          |       |          |         |         |         |       |         |          |          |       |
| Female                                   | 26(56.5) | 6(54.5)  | 0.583 | 11(61.1) | 21(53.8) | 0.412 | 22(51.2) | 6(75)   | 3(100)  | 1(33.3) | 0.206 | 5(83.3) | 3(37.5)  | 24(55.8) | 0.231 |
| Male                                     | 20(43.5) | 5(45.5)  |       | 7(38.9)  | 18(46.2) |       | 21(48.8) | 2(25)   | 0(0)    | 2(66.7) |       | 1(16.7) | 5(62.5)  | 19(44.2) |       |
| Age                                      |          |          |       |          |          |       |          |         |         |         |       |         |          |          |       |
| <50                                      | 17(37)   | 6(54.5)  | 0.232 | 9(50)    | 14(35.9) | 0.236 | 18(41.9) | 2(25)   | 3(100)  | 0(0)    | 0.063 | 3(50)   | 4(50)    | 16(37.2) | 0.698 |
| ≥50                                      | 29(63)   | 5(45.5)  |       | 9(50)    | 25(64.1) |       | 25(58.1) | 6(75)   | 0(0)    | 3(100)  |       | 2(50)   | 4(50)    | 27(62.8) |       |
| Histologic type                          |          |          |       |          |          |       |          |         |         |         |       |         |          |          |       |
| Adenocarcinoma                           | 43(93.5) | 11(100)  | 0.519 | 17(94.4) | 37(94.9) | 0.688 | 40(93)   | 8(100)  | 3(100)  | 3(100)  | 0.794 | 6(100)  | 8(100)   | 40(93)   | 0.597 |
| Mucinous carcinoma/signet ring carcinoma | 3(6.5)   | 0(0)     |       | 1(5.6)   | 2(5.1)   |       | 3(7)     | 0(0)    | 0(0)    | 0(0)    |       | 0(0)    | 0(0)     | 0(0)     |       |
| Degrees of differentiation               |          |          |       |          |          |       |          |         |         |         |       |         |          |          |       |
| Well                                     | 24(52.2) | 5(45.5)  | 0.562 | 9(50)    | 20(51.3) | 0.446 | 21(48.8) | 4(50)   | 2(66.7) | 2(66.7) | 0.958 | 3(50)   | 3(37.5)  | 23(53.5) | 0.801 |
| Moderate                                 | 19(41.3) | 6(54.5)  |       | 9(50)    | 16(41)   |       | 19(44.2) | 4(50)   | 1(33.3) | 1(33.3) |       | 3(50)   | 4(50)    | 18(41.9) |       |
| poor/undifferentiated                    | 3(6.5)   | 0(0)     |       | 0(0)     | 3(7.7)   |       | 3(7)     | 0(0)    | 0(0)    | 0(0)    |       | 0(0)    | 1(12.5)  | 2(4.7)   |       |
| Perineural invasion                      |          |          |       |          |          |       |          |         |         |         |       |         |          |          |       |
| Yes                                      | 5(10.9)  | 2(18.2)  | 0.610 | 3(16.7)  | 4(10.3)  | 0.667 | 6(14)    | 1(12.5) | 0(0)    | 0(0)    | 0.813 | 0(0)    | 1(12.5)  | 6(14)    | 0.621 |
| No                                       | 41(89.1) | 9(81.8)  |       | 15(83.3) | 35(89.7) |       | 37(86)   | 7(87.5) | 3(100)  | 0(0)    |       | 6(100)  | 7(87.5)  | 37(86)   |       |
| Vascular invasion                        |          |          |       |          |          |       |          |         |         |         |       |         |          |          |       |
| Yes                                      | 3(18.2)  | 2(18.2)  | 0.244 | 2(11.1)  | 3(7.7)   | 0.646 | 5(11.6)  | 0(0)    | 0(0)    | 0(0)    | 0.618 | 0(0)    | 0(0)     | 5(11.6)  | 0.410 |
| No                                       | 43(93.5) | 9(81.8)  |       | 16(88.9) | 36(92.3) |       | 38(88.4) | 8(100)  | 3(100)  | 3(100)  |       | 6(100)  | 8(100)   | 38(88.4) |       |

|                              |            |          |          |       |          |          |       |          |         |         |         |         |          |          |       |
|------------------------------|------------|----------|----------|-------|----------|----------|-------|----------|---------|---------|---------|---------|----------|----------|-------|
| ypN                          | <b>No</b>  | 31(67.4) | 7(63.6)  | 0.537 | 11(61.1) | 27(69.2) | 0.377 | 29(67.4) | 4(50)   | 3(100)  | 2(66.7) | 4(66.7) | 7(87.5)  | 27(62.8) | 0.396 |
|                              | <b>N+</b>  | 15(32.6) | 4(36.4)  |       | 7(38.9)  | 12(30.8) |       | 14(32.6) | 4(50)   | 0(0)    | 1(33.3) | 2(33.4) | 1(12.5)  | 16(37.2) |       |
| ypT                          | <b>T0</b>  | 5(10.9)  | 2(18.2)  | 0.086 | 2(11.1)  | 5(12.8)  | 0.515 | 6(14)    | 1(12.5) | 0(0)    | 0(0)    | 0(0)    | 4(50)    | 3(7)     | 0.091 |
|                              | <b>T1</b>  | 2(4.3)   | 1(9.1)   |       | 0(0)     | 3(7.7)   |       | 3(7)     | 0(0)    | 0(0)    | 0(0)    | 0(0)    | 0(0)     | 3(7)     |       |
|                              | <b>T2</b>  | 20(43.5) | 1(9.1)   |       | 9(50)    | 12(30.8) |       | 15(34.9) | 3(37.5) | 2(66.7) | 1(33.3) | 3(50)   | 2(25)    | 16(37.2) |       |
|                              | <b>T3</b>  | 19(41.3) | 6(54.5)  |       | 7(38.9)  | 18(46.2) |       | 18(41.9) | 4(50)   | 1(33.3) | 2(66.7) | 3(50)   | 2(25)    | 20(46.5) |       |
|                              | <b>T4</b>  | 0(0)     | 1(0)     |       | 0(0)     | 1(2.6)   |       | 1(2.3)   | 0(0)    | 0(0)    | 0(0)    | 0(0)    | 0(0)     | 1(2.3)   |       |
| Recurrence                   | <b>No</b>  | 44(96.7) | 1(9.1)   | 0.481 | 16(88.9) | 38(97.4) | 0.232 | 40(93)   | 8(100)  | 3(0)    | 3(100)  | 5(100)  | 20(95.2) | 29(93.5) | 0.829 |
|                              | <b>Yes</b> | 2(4.3)   | 10(90.9) |       | 2(11.1)  | 1(2.6)   |       | 3(7)     | 0(0)    | 0(0)    | 0(0)    | 0(0)    | 1(4.8)   | 2(6.5)   |       |
| Metastasis                   | <b>No</b>  | 29(63)   | 8(72.7)  | 0.409 | 14(77.8) | 23(59)   | 0.139 | 28(65.1) | 7(87.5) | 2(66.7) | 0(0)    | 3(50)   | 6(75)    | 28(65.1) | 0.624 |
|                              | <b>Yes</b> | 17(37)   | 3(27.3)  |       | 4(22.2)  | 16(41)   |       | 15(34.9) | 1(12.5) | 1(33.3) | 3(100)  | 3(50)   | 2(25)    | 15(34.9) |       |
| Metastasis or/and recurrence | <b>No</b>  | 28(60.9) | 8(72.7)  | 0.357 | 13(72.2) | 23(59)   | 0.254 | 27(62.8) | 7(87.5) | 2(66.7) | 0(0)    | 3(50)   | 6(75)    | 27(62.8) | 0.628 |
|                              | <b>Yes</b> | 18(39.1) | 3(27.3)  |       | 5(27.8)  | 16(41)   |       | 16(37.2) | 1(33.3) | 1(33.3) | 3(100)  | 3(50)   | 2(25)    | 16(37.2) |       |

**TableS5:** Association between clinicopathological characteristics and KRAS and NRAS mutations

|                                                 | KRAS status    |          |          |                |        |          |                |          |          | NRAS status    |          |                |        |                |       | <i>P</i> |          |   |  |
|-------------------------------------------------|----------------|----------|----------|----------------|--------|----------|----------------|----------|----------|----------------|----------|----------------|--------|----------------|-------|----------|----------|---|--|
|                                                 | Exon 2<br>N=57 |          |          | Exon 3<br>N=50 |        |          | Exon 4<br>N=51 |          |          | Exon 2<br>N=47 |          | Exon 3<br>N=57 |        | Exon 4<br>N=44 |       |          |          |   |  |
|                                                 | M              | WT       | <i>P</i> | M              | WT     | <i>P</i> | M              | WT       | <i>P</i> | M              | WT       | <i>P</i>       | M      | WT             |       |          |          |   |  |
| Gender                                          |                |          |          |                |        |          |                |          |          |                |          |                |        |                |       |          |          |   |  |
| <b>Female</b>                                   | 7(43.8)        | 16(39)   | 0.189    | 0(0)           | 28(56) | ★        | 3(75)          | 25(53.2) | 0.383    | 0(0)           | 26(56.5) | 0.447          | 0(0)   | 32(57.1)       | 0.439 | 0(0)     | 23(52.3) | ★ |  |
| <b>Male</b>                                     | 9(56.3)        | 25(61)   |          | 0(0)           | 22(44) |          | 1(25)          | 22(46.8) |          | 1(100)         | 20(43.5) |                | 1(100) | 24(42.9)       |       | 0(0)     | 21(47.7) |   |  |
| Age                                             |                |          |          |                |        |          |                |          |          |                |          |                |        |                |       |          |          |   |  |
| <b>&lt;50</b>                                   | 5(31.3)        | 18(43.9) | 0.285    | 0(0)           | 21(42) | ★        | 3(75)          | 17(36.2) | 0.161    | 0(0)           | 20(43.5) | 0.574          | 0(0)   | 23(41.1)       | 0.596 | 0(0)     | 17(38.6) | ★ |  |
| <b>≥50</b>                                      | 11(68.8)       | 23(56.1) |          | 0(0)           | 29(58) |          | 1(25)          | 30(63.8) |          | 1(100)         | 26(56.5) |                | 1(100) | 33(58.9)       |       | 0(0)     | 27(61.4) |   |  |
| Histologic type                                 |                |          |          |                |        |          |                |          |          |                |          |                |        |                |       |          |          |   |  |
| <b>Adenocarcinoma</b>                           | 15(93.8)       | 39(95.1) | 0.636    | 0(0)           | 47(94) | ★        | 4(100)         | 44(93.6) | 0.779    | 1(100)         | 43(93.5) | 0.936          | 1(100) | 53(94.6)       | 0.947 | 0(0)     | 42(95.5) | ★ |  |
| <b>Mucinous carcinoma/signet ring carcinoma</b> | 1(6.3)         | 2(4.9)   |          | 0(0)           | 3(6)   |          | 0(0)           | 3(6.4)   |          | 0(0)           | 3(6.5)   |                | 0(0)   | 3(5.4)         |       | 0(0)     | 2(4.5)   |   |  |
| Degrees of differentiation                      |                |          |          |                |        |          |                |          |          |                |          |                |        |                |       |          |          |   |  |
| <b>Well</b>                                     | 11(68.8)       | 18(43.9) | 0.185    | 0(0)           | 24(48) | ★        | 1(25)          | 24(51.1) | 0.496    | 0(0)           | 22(47.8) | 0.587          | 0(0)   | 29(51.8)       | 0.521 | 0(0)     | 21(47.7) | ★ |  |
| <b>Moderate</b>                                 | 5(31.3)        | 20(48.8) |          | 0(0)           | 24(48) |          | 3(75)          | 21(44.7) |          | 1(100)         | 22(47.8) |                | 1(100) | 24(42.9)       |       | 0(0)     | 22(50)   |   |  |
| <b>poor/undifferentiated</b>                    | 0(0)           | 3(7.3)   |          | 0(0)           | 2(4)   |          | 0(0)           | 2(4.3)   |          | 0(0)           | 2(4.3)   |                | 0(0)   | 3(5.4)         |       | 0(0)     | 1(2.3)   |   |  |
| Perineural invasion                             |                |          |          |                |        |          |                |          |          |                |          |                |        |                |       |          |          |   |  |
| <b>Yes</b>                                      | 1(14.6)        | 6(14.6)  | 0.660    | 0(0)           | 6(12)  | ★        | 1(25)          | 4(8.5)   | 0.347    | 1(100)         | 4(8.7)   | 0.106          | 1(100) | 6(10.7)        | 0.123 | 0(0)     | 5(11.4)  | ★ |  |
| <b>No</b>                                       | 15(93.8)       | 35(85.4) |          | 0(0)           | 44(88) |          | 3(75)          | 43(91.5) |          | 0(0)           | 42(91.3) |                | 0(0)   | 50(89.3)       |       | 0(0)     | 39(88.6) |   |  |
| Vascular invasion                               |                |          |          |                |        |          |                |          |          |                |          |                |        |                |       |          |          |   |  |
| <b>Yes</b>                                      | 1(6.3)         | 4(9.8)   | 1.000    | 0(0)           | 4(8)   | ★        | 1(25)          | 2(4.3)   | 0.221    | 1(100)         | 2(4.3)   | 0.064          | 0(0)   | 5(8.9)         | 1.000 | 0(0)     | 3(6.8)   | ★ |  |
| <b>No</b>                                       | 15(93.8)       | 1(6.3)   |          | 0(0)           | 46(92) |          | 3(75)          | 45(95.7) |          | 0(0)           | 44(95.7) |                | 1(100) | 51(91.1)       |       | 0(0)     | 41(93.2) |   |  |

|                              |               |                     |                      |       |              |                  |               |                    |                      |       |                    |                      |       |                    |                      |       |                    |                  |          |
|------------------------------|---------------|---------------------|----------------------|-------|--------------|------------------|---------------|--------------------|----------------------|-------|--------------------|----------------------|-------|--------------------|----------------------|-------|--------------------|------------------|----------|
| ypN <b>N0</b> <b>N+</b>      |               | 11(68.8)<br>5(31.3) | 27(65.9)<br>14(34.1) | 0.548 | 0(0)<br>0(0) | 34(68)<br>16(32) | ★             | 3(75)<br>1(25)     | 32(68.1)<br>15(31.9) | 0.629 | 1(100)<br>0(0)     | 34(73.9)<br>12(26.1) | 0.277 | 0(0)<br>1(100)     | 37(66.1)<br>19(33.9) | 0.667 | 0(0)<br>0(0)       | 31<br>13         | ★        |
| <b>T2</b>                    | ypT <b>T0</b> | 1(14.6)<br>0(0)     | 6(14.6)<br>3(7.3)    | 0.252 | 0(0)<br>0(0) | 6(12)<br>2(4)    | ★             | 0(0)<br>1(25)      | 5(10.6)<br>1(2.1)    | 0.203 | 0(0)<br>0(0)       | 5(10.9)<br>2(4.3)    | 0.884 | 0<br>0             | 7(12.5)<br>3(5.4)    | 0.861 | 0(0)<br>0(0)       | 4(9.1)<br>1(2.3) | ★        |
|                              | <b>T3</b>     | 5(31.3)             | 16(39)               |       | 0(0)         | 17(34)           | 2(50)         | 18(38.3)           | 0(0)                 |       | 17(37)             | 1(100)               |       | 21(37.5)           | 0(0)                 |       | 17(38.6)           |                  |          |
|                              | <b>T4</b>     | 9(56.3)<br>1(6.3)   | 16(56.3)<br>0(0)     |       | 0(0)<br>0(0) | 24(48)<br>1(2)   | 1(25)<br>0(0) | 22(46.8)<br>1(2.1) | 1(100)<br>0(0)       |       | 21(45.7)<br>1(2.2) | 0<br>0               |       | 24(42.9)<br>1(1.8) | 0(0)<br>0(0)         |       | 21(47.7)<br>1(2.3) |                  |          |
|                              |               |                     |                      |       |              |                  |               |                    |                      |       |                    |                      |       |                    |                      |       |                    |                  |          |
| Recurrence                   | <b>No</b>     | 1(2.4)              | 40(97.6)             | 0.187 | 0(0)         | 47(94)           | ★             | 4(100)             | 44(93.6)             | 0.779 | 1(100)             | 43(93.5)             | 0.936 | 1(100)             | 53(94.6)             | 0.947 | 0(0)               | 41(93.2)         | ★        |
|                              | <b>Yes</b>    | 14(87.5)            | 1(2.4)               |       | 0(0)         | 3(6)             | 0(0)          | 3(6.4)             | 0(0)                 |       | 3(6.5)             | 0(0)                 |       | 3(6.5)             | 0(0)                 |       | 3(5.4)             | 0(0)             | 3(6.8)   |
| Metastasis                   | <b>No</b>     | 5(31.3)             | 26(63.4)             | 0.478 | 0(0)         | 32(64)           | ★             | 0(0)               | 32(68.1)             | 0.016 | 1(100)             | 28(60.9)             | 0.404 | 0(0)               | 37(66.1)             | 0.351 | 0(0)               | 27(61.4)         | ★        |
|                              | <b>Yes</b>    | 15(36.6)            | 11(68.8)             |       | 0(0)         | 18(36)           | 4(0)          | 15(31.9)           | 0(0)                 |       | 18(39.1)           | 0(0)                 |       | 18(39.1)           | 1(100)               |       | 19(33.9)           | 0(0)             | 17(38/6) |
| Metastasis or/and recurrence | <b>No</b>     | 11(68.8)            | 5(31.3)              | 0.410 | 19(38)       | 31(62)           | ★             | 0(0)               | 31(66)               | 0.019 | 0(0)               | 27(58.7)             | 0.426 | 0(0)               | 36(64.3)             | 0.368 | 0(0)               | 18(40.9)         | ★        |
|                              | <b>Yes</b>    | 5(31.3)             | 16(39)               |       | 0(0)         | 0(0)             | 4(100)        | 16(34)             | 1(100)               |       | 19(41.3)           | 1(100)               |       | 20(35.7)           | 0(0)                 |       | 26(59.1)           |                  |          |

★,p was not calculated because the variable is constant
